# Supplementary material
Source: publisher figshare collection journal article supplement (https://gsapubs.figshare.com/ndownloader/files/23316713)
Supplement: Supplementary file 1 [file 23316713]

## Sheet: DR3
Chapman, A.D., and Laskowski, A.K., 2019, Detrital zircon U-Pb data reveal a Mississippian sediment dispersal network originating in the Appalachian orogen, traversing North America along its southern shelf, and reaching as far as the southwest USA: Lithosphere, https://doi.org/10.1130/L1068.1.
GSA Data Repository Item 2019260
Reconstructed Source Distributions					Compare Input & Reconstructed Sink Samples						Sink Sample Weights
Age (Ma)	Source 1	Source 2				Mean		St. Dev.			P1	P2	P3	P4	P5	P6	P7	P8	P9	P10	P11	P12	P13	P14	P15	P16	P17	P18	P19	P20	P21	P22	P23	P24	P25	P26	P27	P28	P29	P30	P31	P32	P33	P34	P35	P36	P37	P38	P39
0	6.45478e-18	0			Cross-correlation	0.470059	±	0.25416		Weights Source 1	0.00274125	0.0314539	0.145785	0.0380975	0.0472845	0.0883828	0.00485582	0.0923	0	0	0	0	0	0.0459256	0.451245	0.196696	0	0	0.244946	0.106944	0	0.405697	0.112704	0.304998	0.310916	0.283118	0.960325	0.256023	1	0.101641	0.221448	0.323533	0.220023	0.0396779	0.0706933	0.276935	0.317032	0.405207	0.0820776
1	1.33317e-17	0			Likeness	0.56708	±	0.145157		Weights Source 2	0.997259	0.968546	0.854215	0.961903	0.952716	0.911617	0.995144	0.9077	1	1	1	1	1	0.954074	0.548755	0.803304	1	1	0.755054	0.893056	1	0.594303	0.887296	0.695002	0.689084	0.716882	0.0396755	0.743977	0	0.898359	0.778552	0.676467	0.779977	0.960322	0.929307	0.723065	0.682968	0.594793	0.917922
2	2.72614e-17	0			Kuiper V Value	0.31142	±	0.158022
3	5.51909e-17	0			KS D Value	0.244563	±	0.146599		Cross-correlation	0.571581	0.744813	0.697925	0.911312	0.69671	0.593112	0.442635	0.748097	0.510319	0.846113	0.715474	0.80196	0.695648	0.723282	0.315628	0.553274	0.540148	0.355876	0.303954	0.483535	0.469833	0.453693	0.475404	0.225756	0.218985	0.607955	0.750776	0.384764	0.658162	0.486836	0.0802649	0.120666	0.251304	0.769962	0.636987	0.201459	0.149955	0.415055	0.805792
4	1.10623e-16	0								Likeness	0.605798	0.735454	0.676598	0.852975	0.721682	0.628299	0.612246	0.74618	0.685794	0.761509	0.659134	0.73414	0.65165	0.672814	0.568224	0.704301	0.623387	0.49871	0.516251	0.559341	0.522445	0.620612	0.607101	0.586431	0.587966	0.720401	0.683921	0.657782	0.54583	0.653218	0.436437	0.421981	0.533264	0.760927	0.73034	0.4884	0.523262	0.603646	0.804956
5	2.19521e-16	0			Number of sink samples	186				Kuiper V Value	0.202727	0.11732	0.185596	0.0967431	0.19842	0.170229	0.21999	0.121888	0.165719	0.1502	0.321531	0.244002	0.257565	0.24692	0.308148	0.222452	0.111758	0.394902	0.379635	0.288403	0.27266	0.151157	0.224948	0.304914	0.298258	0.190693	0.170089	0.233646	0.214149	0.203675	0.502485	0.287401	0.278447	0.13301	0.195687	0.272589	0.262867	0.144071	0.13053
6	4.31287e-16	0			Mean Cross-correlation of sink samples	0.147				KS D Value	0.192763	0.0700036	0.107896	0.057453	0.174528	0.120837	0.219986	0.110716	0.145985	0.127787	0.181879	0.139326	0.189569	0.180569	0.305849	0.213476	0.0851463	0.221829	0.31185	0.220142	0.216182	0.124365	0.222297	0.239253	0.239482	0.135936	0.0887115	0.22195	0.149876	0.166099	0.333142	0.157429	0.229212	0.07709	0.141402	0.143839	0.216677	0.106977	0.129986
7	8.38907e-16	0			Range Cross-correlation of sink samples	1
8	1.61554e-15	0			Mean Kuiper V value of sink samples	0.589
9	3.08021e-15	0			Range Kuiper V value of sink samples	1
10	5.81431e-15	0			Final Residual	0.500724
11	1.08661e-14	0			Number of Iterations	100
12	2.01051e-14	0
13	3.68295e-14	0
14	6.67948e-14	0
15	1.19935e-13	0
16	2.1321e-13	0
17	3.75253e-13	0
18	6.53882e-13	0
19	1.12806e-12	0
20	1.92673e-12	0
21	3.25811e-12	0
22	5.45468e-12	0
23	9.04127e-12	0
24	1.4837e-11	0
25	2.41058e-11	0
26	3.8775e-11	0
27	6.17505e-11	0
28	9.73612e-11	0
29	1.51981e-10	0
30	2.34881e-10	0
31	3.59389e-10	0
32	5.44425e-10	0
33	8.16524e-10	0
34	1.21243e-09	0
35	1.78238e-09	0
36	2.5942e-09	0
37	3.7382e-09	0
38	5.33308e-09	0
39	7.53271e-09	0
40	1.05337e-08	0
41	1.45837e-08	0
42	1.999e-08	0
43	2.71277e-08	0
44	3.64479e-08	0
45	4.84828e-08	0
46	6.38498e-08	0
47	8.32509e-08	0
48	1.07467e-07	0
49	1.37347e-07	0
50	1.73788e-07	0
51	2.1771e-07	0
52	2.70018e-07	0
53	3.31561e-07	0
54	4.03082e-07	0
55	4.85153e-07	0
56	5.78125e-07	0
57	6.82059e-07	0
58	7.96671e-07	0
59	9.21283e-07	0
60	1.05479e-06	0
61	1.19562e-06	0
62	1.34177e-06	0
63	1.4908e-06	0
64	1.63991e-06	0
65	1.78598e-06	0
66	1.9257e-06	0
67	2.0557e-06	0
68	2.17264e-06	0
69	2.27338e-06	0
70	2.35512e-06	0
71	2.41553e-06	0
72	2.45284e-06	0
73	2.46593e-06	0
74	2.45443e-06	0
75	2.41868e-06	0
76	2.35973e-06	0
77	2.27931e-06	0
78	2.17972e-06	0
79	2.06375e-06	0
80	1.9345e-06	0
81	1.79531e-06	0
82	1.64955e-06	0
83	1.50054e-06	0
84	1.35141e-06	0
85	1.205e-06	0
86	1.06375e-06	0
87	9.29721e-07	0
88	8.04491e-07	0
89	6.89203e-07	0
90	5.84561e-07	0
91	4.90874e-07	0
92	4.081e-07	0
93	3.35908e-07	0
94	2.73736e-07	0
95	2.20851e-07	0
96	1.76411e-07	0
97	1.39511e-07	0
98	1.09231e-07	0
99	8.46726e-08	0
100	6.49825e-08	0
101	4.93749e-08	0
102	3.71428e-08	0
103	2.7663e-08	0
104	2.03977e-08	0
105	1.48908e-08	0
106	1.07625e-08	0
107	7.70136e-09	0
108	5.45603e-09	0
109	3.82687e-09	0
110	2.65747e-09	0
111	1.82704e-09	0
112	1.24362e-09	0
113	8.38073e-10	0
114	5.59158e-10	0
115	3.69355e-10	0
116	2.41551e-10	0
117	1.56399e-10	0
118	1.00257e-10	0
119	6.36284e-11	0
120	3.99802e-11	0
121	2.48712e-11	0
122	1.53181e-11	0
123	9.34052e-12	0
124	5.63889e-12	0
125	3.37034e-12	0
126	1.99439e-12	0
127	1.16843e-12	0
128	6.77728e-13	0
129	3.89191e-13	0
130	2.17657e-13	9.90018e-15
131	1.03601e-13	5.73583e-14
132	2.42629e-14	1.23602e-13
133	0	2.22462e-13
134	0	3.85912e-13
135	0	6.62845e-13
136	0	1.12728e-12
137	0	1.89822e-12
138	0	3.1649e-12
139	0	5.22486e-12
140	0	8.54063e-12
141	0	1.38232e-11
142	0	2.2153e-11
143	0	3.51532e-11
144	0	5.5234e-11
145	0	8.5933e-11
146	0	1.32382e-10
147	0	2.01935e-10
148	0	3.0501e-10
149	0	4.56182e-10
150	0	6.75593e-10
151	0	9.90739e-10
152	0	1.43867e-09
153	0	2.0687e-09
154	0	2.94556e-09
155	0	4.15313e-09
156	0	5.79861e-09
157	0	8.01709e-09
158	0	1.09763e-08
159	0	1.48816e-08
160	0	1.99799e-08
161	0	2.65643e-08
162	0	3.49755e-08
163	0	4.56033e-08
164	0	5.88841e-08
165	0	7.52966e-08
166	0	9.53525e-08
167	0	1.19584e-07
168	0	1.48528e-07
169	0	1.827e-07
170	0	2.22574e-07
171	0	2.68549e-07
172	0	3.20921e-07
173	0	3.79846e-07
174	0	4.45315e-07
175	0	5.17126e-07
176	0	5.94862e-07
177	0	6.77885e-07
178	0	7.65333e-07
179	0	8.56143e-07
180	0	9.49077e-07
181	0	1.04277e-06
182	0	1.13582e-06
183	0	1.22683e-06
184	0	1.31452e-06
185	0	1.39787e-06
186	0	1.47616e-06
187	0	1.54913e-06
188	0	1.61707e-06
189	0	1.68089e-06
190	0	1.74218e-06
191	0	1.80329e-06
192	0	1.86727e-06
193	0	1.93784e-06
194	0	2.01936e-06
195	0	2.11659e-06
196	0	2.23462e-06
197	0	2.37858e-06
198	0	2.5534e-06
199	0	2.76353e-06
200	0	3.01262e-06
201	0	3.30326e-06
202	0	3.63663e-06
203	0	4.01232e-06
204	0	4.42807e-06
205	0	4.87969e-06
206	0	5.36099e-06
207	0	5.86386e-06
208	0	6.37843e-06
209	0	6.89332e-06
210	0	7.39606e-06
211	0	7.87349e-06
212	0	8.31231e-06
213	0	8.69966e-06
214	0	9.02363e-06
215	0	9.27388e-06
216	0	9.44203e-06
217	0	9.52215e-06
218	0	9.51097e-06
219	0	9.40805e-06
220	0	9.21579e-06
221	0	8.93928e-06
222	0	8.58607e-06
223	0	8.16573e-06
224	0	7.68945e-06
225	0	7.16949e-06
226	0	6.61862e-06
227	0	6.04964e-06
228	0	5.47482e-06
229	0	4.90555e-06
230	0	4.35191e-06
231	0	3.82248e-06
232	0	3.32417e-06
233	0	2.86215e-06
234	0	2.43991e-06
235	0	2.05934e-06
236	0	1.7209e-06
237	0	1.42385e-06
238	0	1.16643e-06
239	0	9.46144e-07
240	0	7.59961e-07
241	0	6.04534e-07
242	0	4.76383e-07
243	0	3.72056e-07
244	0	2.88252e-07
245	0	2.21913e-07
246	0	1.70292e-07
247	0	1.30992e-07
248	0	1.01988e-07
249	0	8.16269e-08
250	0	6.86261e-08
251	0	6.20539e-08
252	0	6.13115e-08
253	0	6.61102e-08
254	0	7.64479e-08
255	0	9.25849e-08
256	0	1.1502e-07
257	0	1.44463e-07
258	0	1.81809e-07
259	0	2.28106e-07
260	0	2.84518e-07
261	0	3.52286e-07
262	0	4.32683e-07
263	0	5.26957e-07
264	0	6.36281e-07
265	0	7.61693e-07
266	0	9.04033e-07
267	0	1.06389e-06
268	0	1.24155e-06
269	0	1.43695e-06
270	0	1.64967e-06
271	0	1.87889e-06
272	0	2.12342e-06
273	0	2.38175e-06
274	0	2.65206e-06
275	0	2.93234e-06
276	0	3.22044e-06
277	0	3.51423e-06
278	0	3.81169e-06
279	0	4.11107e-06
280	0	4.41099e-06
281	0	4.71056e-06
282	0	5.00953e-06
283	0	5.30829e-06
284	0	5.60804e-06
285	0	5.91069e-06
286	0	6.21896e-06
287	0	6.53625e-06
288	0	6.86661e-06
289	0	7.21462e-06
290	0	7.58524e-06
291	0	7.98367e-06
292	0	8.41519e-06
293	0	8.88494e-06
294	0	9.39785e-06
295	0	9.95839e-06
296	0	1.05705e-05
297	0	1.12374e-05
298	0	1.19617e-05
299	0	1.27451e-05
300	0	1.35886e-05
301	0	1.44922e-05
302	0	1.54554e-05
303	0	1.64767e-05
304	0	1.7554e-05
305	0	1.86846e-05
306	0	1.98652e-05
307	0	2.10919e-05
308	0	2.23604e-05
309	0	2.36659e-05
310	0	2.50034e-05
311	0	2.63673e-05
312	0	2.77523e-05
313	0	2.91526e-05
314	0	3.05629e-05
315	0	3.1978e-05
316	1.28225e-07	3.33754e-05
317	9.18426e-07	3.46771e-05
318	1.85466e-06	3.59521e-05
319	2.9533e-06	3.71964e-05
320	4.23279e-06	3.84076e-05
321	5.71379e-06	3.95844e-05
322	7.41909e-06	4.07271e-05
323	9.37342e-06	4.18376e-05
324	1.1603e-05	4.29195e-05
325	1.41346e-05	4.39779e-05
326	1.6995e-05	4.50199e-05
327	2.02096e-05	4.6054e-05
328	2.38006e-05	4.70903e-05
329	2.77864e-05	4.81406e-05
330	3.21789e-05	4.92182e-05
331	3.69831e-05	5.03377e-05
332	4.2195e-05	5.15155e-05
333	4.78004e-05	5.27691e-05
334	5.3775e-05	5.41175e-05
335	6.00833e-05	5.5581e-05
336	6.66792e-05	5.71808e-05
337	7.3507e-05	5.89388e-05
338	8.05026e-05	6.0877e-05
339	8.75956e-05	6.30175e-05
340	9.47115e-05	6.53809e-05
341	0.000101775	6.79864e-05
342	0.000108711	7.08504e-05
343	0.00011545	7.39858e-05
344	0.000121929	7.74011e-05
345	0.000128095	8.11e-05
346	0.000133904	8.50804e-05
347	0.000139327	8.93347e-05
348	0.000144344	9.38495e-05
349	0.000148948	9.86059e-05
350	0.000153143	0.000103581
351	0.00015694	0.000108747
352	0.000160358	0.000114077
353	0.000163417	0.00011954
354	0.000166139	0.00012511
355	0.000168543	0.000130761
356	0.000170642	0.000136476
357	0.000172443	0.00014224
358	0.000173943	0.00014805
359	0.000175131	0.000153911
360	0.000175984	0.000159836
361	0.000176473	0.000165849
362	0.00017656	0.000171981
363	0.000176204	0.000178273
364	0.000175358	0.000184771
365	0.000173977	0.000191524
366	0.000172019	0.000198586
367	0.000169447	0.000206007
368	0.000166231	0.000213838
369	0.000162351	0.000222123
370	0.000157799	0.000230902
371	0.000152576	0.000240206
372	0.000146697	0.000250058
373	0.000140188	0.000260473
374	0.000133084	0.000271455
375	0.00012543	0.000283003
376	0.000117277	0.000295111
377	0.00010868	0.000307765
378	9.96979e-05	0.000320951
379	9.03895e-05	0.000334654
380	8.08115e-05	0.000348863
381	7.1017e-05	0.000363571
382	6.10539e-05	0.000378776
383	5.09637e-05	0.000394487
384	4.07807e-05	0.000410723
385	3.05316e-05	0.000427514
386	2.02356e-05	0.000444902
387	9.90492e-06	0.00046294
388	0	0.000481631
389	0	0.000499731
390	0	0.0005187
391	0	0.000538625
392	0	0.000559595
393	0	0.000581698
394	0	0.000605016
395	0	0.000629621
396	0	0.000655572
397	0	0.000682908
398	0	0.000711649
399	0	0.000741786
400	0	0.000773285
401	0	0.000806078
402	0	0.000840069
403	0	0.000875133
404	0	0.000911112
405	0	0.000947826
406	0	0.000985068
407	0	0.00102262
408	0	0.00106024
409	0	0.00109769
410	0	0.00113472
411	0	0.00117108
412	0	0.00120655
413	0	0.0012409
414	0	0.00127391
415	0	0.00130539
416	0	0.00133517
417	0	0.00136309
418	0	0.00138901
419	0	0.0014128
420	0	0.00143436
421	0	0.0014536
422	0	0.00147046
423	0	0.00148485
424	0	0.00149675
425	0	0.00150612
426	0	0.00151294
427	0	0.00151722
428	0	0.00151898
429	0	0.00151826
430	0	0.00151512
431	0	0.00150965
432	0	0.00150197
433	0	0.00149221
434	0	0.00148055
435	0	0.00146716
436	0	0.00145225
437	0	0.00143606
438	0	0.00141882
439	0	0.00140078
440	0	0.00138221
441	0	0.00136335
442	0	0.00134446
443	0	0.00132577
444	0	0.0013075
445	0	0.00128985
446	0	0.001273
447	0	0.00125708
448	0	0.00124222
449	0	0.00122847
450	0	0.0012159
451	0	0.00120448
452	0	0.0011942
453	0	0.00118496
454	0	0.00117667
455	0	0.00116919
456	0	0.00116233
457	0	0.0011559
458	0	0.00114967
459	0	0.00114342
460	0	0.00113689
461	0	0.00112984
462	0	0.00112202
463	0	0.00111318
464	0	0.00110312
465	0	0.00109164
466	0	0.00107858
467	0	0.0010638
468	0	0.00104723
469	0	0.00102882
470	0	0.00100858
471	0	0.000986556
472	0	0.000962851
473	0	0.000937608
474	0	0.000911011
475	0	0.000883278
476	0	0.00085466
477	0	0.000825426
478	0	0.000795864
479	0	0.000766268
480	0	0.00073693
481	0	0.000708135
482	0	0.000680153
483	0	0.000653232
484	0	0.000627591
485	0	0.00060342
486	0	0.000580873
487	1.22184e-05	0.000558369
488	2.47852e-05	0.000537634
489	3.64774e-05	0.000518879
490	4.71886e-05	0.000502121
491	5.68287e-05	0.000487336
492	6.53261e-05	0.000474469
493	7.26297e-05	0.000463427
494	7.87102e-05	0.000454092
495	8.35608e-05	0.000446319
496	8.71964e-05	0.000439945
497	8.96533e-05	0.000434792
498	9.09874e-05	0.000430673
499	9.12719e-05	0.000427399
500	9.0595e-05	0.000424784
501	8.90564e-05	0.00042265
502	8.67646e-05	0.000420831
503	8.38334e-05	0.000419179
504	8.03785e-05	0.000417569
505	7.65146e-05	0.000415898
506	7.23526e-05	0.00041409
507	6.79971e-05	0.000412094
508	6.35443e-05	0.000409889
509	5.90803e-05	0.000407477
510	5.46805e-05	0.000404885
511	5.04084e-05	0.00040216
512	4.63156e-05	0.000399368
513	4.24426e-05	0.000396587
514	3.88186e-05	0.000393905
515	3.54634e-05	0.000391416
516	3.23884e-05	0.000389211
517	2.9598e-05	0.000387383
518	2.70917e-05	0.000386012
519	2.48655e-05	0.000385172
520	2.29139e-05	0.000384922
521	2.12313e-05	0.000385306
522	1.98134e-05	0.000386353
523	1.86582e-05	0.000388075
524	1.77666e-05	0.000390468
525	1.71428e-05	0.000393514
526	1.67937e-05	0.000397179
527	1.67288e-05	0.000401417
528	1.69583e-05	0.000406175
529	1.74925e-05	0.000411387
530	1.83402e-05	0.000416985
531	1.95065e-05	0.000422893
532	2.0992e-05	0.000429035
533	2.27913e-05	0.000435332
534	2.48921e-05	0.000441707
535	2.72749e-05	0.00044808
536	2.99132e-05	0.000454377
537	3.2774e-05	0.00046052
538	3.58195e-05	0.000466437
539	3.90083e-05	0.000472055
540	4.22978e-05	0.000477305
541	4.5646e-05	0.000482118
542	4.90137e-05	0.000486429
543	5.23663e-05	0.000490175
544	5.56754e-05	0.000493297
545	5.89193e-05	0.00049574
546	6.20837e-05	0.000497455
547	6.51609e-05	0.000498398
548	6.8149e-05	0.000498535
549	7.10501e-05	0.000497838
550	7.38684e-05	0.000496293
551	7.66079e-05	0.000493895
552	7.927e-05	0.000490651
553	8.18515e-05	0.000486582
554	8.43428e-05	0.000481722
555	8.67266e-05	0.000476121
556	8.89776e-05	0.000469839
557	9.1062e-05	0.000462954
558	9.29388e-05	0.000455551
559	9.45614e-05	0.000447731
560	9.58789e-05	0.0004396
561	9.68396e-05	0.000431276
562	9.73925e-05	0.000422878
563	9.7491e-05	0.000414531
564	9.70947e-05	0.000406359
565	9.61723e-05	0.000398484
566	9.47028e-05	0.000391023
567	9.26769e-05	0.000384089
568	9.00977e-05	0.000377784
569	8.69809e-05	0.000372201
570	8.33535e-05	0.000367421
571	7.92535e-05	0.000363515
572	7.4728e-05	0.000360539
573	6.98317e-05	0.000358536
574	6.46246e-05	0.000357538
575	5.91706e-05	0.000357562
576	5.35351e-05	0.000358614
577	4.7784e-05	0.000360687
578	4.19817e-05	0.000363762
579	3.61901e-05	0.000367811
580	3.04679e-05	0.000372795
581	2.48696e-05	0.000378665
582	1.94448e-05	0.000385366
583	1.42384e-05	0.000392835
584	9.28951e-06	0.000401005
585	4.63176e-06	0.000409806
586	2.9265e-07	0.000419167
587	0	0.000428501
588	0	0.000438267
589	0	0.000448445
590	0	0.000458982
591	0	0.000469832
592	0	0.00048096
593	0	0.00049234
594	0	0.000503955
595	0	0.000515795
596	0	0.000527859
597	0	0.000540146
598	0	0.000552656
599	0	0.000565384
600	0	0.000578316
601	0	0.000591425
602	0	0.000604668
603	0	0.00061798
604	0	0.000631278
605	0	0.000644451
606	0	0.000657371
607	0	0.000669887
608	0	0.000681834
609	0	0.000693033
610	0	0.000703302
611	0	0.000712461
612	0	0.000720338
613	0	0.000726775
614	0	0.000731641
615	0	0.000734828
616	0	0.000736264
617	0	0.000735911
618	0	0.000733767
619	0	0.000729866
620	0	0.000724276
621	0	0.000717095
622	0	0.000708444
623	0	0.000698466
624	0	0.000687316
625	0	0.000675153
626	0	0.000662139
627	0	0.000648432
628	0	0.000634176
629	0	0.000619507
630	0	0.000604542
631	0	0.000589382
632	0	0.000574112
633	0	0.000558803
634	0	0.000543509
635	0	0.000528274
636	0	0.000513134
637	2.90119e-07	0.000498078
638	3.52542e-06	0.000482764
639	6.5207e-06	0.000467659
640	9.25518e-06	0.000452794
641	1.17159e-05	0.000438199
642	1.38976e-05	0.000423905
643	1.5802e-05	0.000409946
644	1.74372e-05	0.000396358
645	1.88168e-05	0.000383175
646	1.99594e-05	0.000370433
647	2.0887e-05	0.000358161
648	2.16246e-05	0.000346389
649	2.21991e-05	0.000335136
650	2.26383e-05	0.000324418
651	2.29704e-05	0.00031424
652	2.32231e-05	0.000304601
653	2.34233e-05	0.000295491
654	2.35962e-05	0.000286889
655	2.37654e-05	0.00027877
656	2.39523e-05	0.000271102
657	2.41761e-05	0.000263848
658	2.44538e-05	0.000256968
659	2.47997e-05	0.000250422
660	2.52261e-05	0.000244172
661	2.57425e-05	0.000238181
662	2.63563e-05	0.000232417
663	2.70724e-05	0.000226853
664	2.78931e-05	0.000221468
665	2.88182e-05	0.000216246
666	2.98447e-05	0.000211176
667	3.0967e-05	0.000206255
668	3.21764e-05	0.000201481
669	3.34611e-05	0.000196855
670	3.48065e-05	0.000192382
671	3.61949e-05	0.000188065
672	3.76058e-05	0.000183909
673	3.90163e-05	0.000179915
674	4.04012e-05	0.000176085
675	4.1734e-05	0.000172418
676	4.29871e-05	0.00016891
677	4.41326e-05	0.000165557
678	4.51431e-05	0.000162354
679	4.59924e-05	0.000159295
680	4.66564e-05	0.000156375
681	4.71136e-05	0.000153591
682	4.73458e-05	0.00015094
683	4.73389e-05	0.000148423
684	4.70831e-05	0.000146044
685	4.65734e-05	0.000143808
686	4.58097e-05	0.000141724
687	4.47973e-05	0.000139803
688	4.35467e-05	0.000138056
689	4.20732e-05	0.000136496
690	4.03974e-05	0.000135136
691	3.85441e-05	0.000133984
692	3.65422e-05	0.00013305
693	3.44238e-05	0.000132336
694	3.22237e-05	0.000131842
695	2.9978e-05	0.000131562
696	2.77238e-05	0.000131481
697	2.54976e-05	0.000131582
698	2.33343e-05	0.000131837
699	2.12663e-05	0.000132214
700	1.93226e-05	0.000132674
701	1.75277e-05	0.000133173
702	1.59013e-05	0.000133664
703	1.44576e-05	0.000134098
704	1.32053e-05	0.000134423
705	1.21472e-05	0.00013459
706	1.12811e-05	0.000134552
707	1.05998e-05	0.000134268
708	1.00919e-05	0.000133702
709	9.7425e-06	0.000132826
710	9.53391e-06	0.000131619
711	9.44664e-06	0.000130071
712	9.46008e-06	0.00012818
713	9.55325e-06	0.000125956
714	9.70545e-06	0.000123415
715	9.89672e-06	0.000120581
716	1.01083e-05	0.000117487
717	1.03228e-05	0.000114171
718	1.05246e-05	0.000110672
719	1.06997e-05	0.000107037
720	1.0836e-05	0.000103309
721	1.09231e-05	9.95336e-05
722	1.09523e-05	9.57551e-05
723	1.09168e-05	9.20143e-05
724	1.08115e-05	8.8349e-05
725	1.0633e-05	8.47931e-05
726	1.03794e-05	8.13759e-05
727	1.00506e-05	7.81221e-05
728	9.64824e-06	7.50516e-05
729	9.17532e-06	7.21793e-05
730	8.63646e-06	6.95154e-05
731	8.03768e-06	6.70655e-05
732	7.38628e-06	6.48307e-05
733	6.69068e-06	6.28082e-05
734	5.96023e-06	6.09914e-05
735	5.20497e-06	5.93702e-05
736	4.43536e-06	5.79317e-05
737	3.66205e-06	5.66607e-05
738	2.89555e-06	5.554e-05
739	2.14598e-06	5.45512e-05
740	1.42275e-06	5.36754e-05
741	7.34361e-07	5.28939e-05
742	8.81634e-08	5.21888e-05
743	0	5.1473e-05
744	0	5.07985e-05
745	0	5.01669e-05
746	0	4.9571e-05
747	0	4.9007e-05
748	0	4.84748e-05
749	0	4.79786e-05
750	0	4.7526e-05
751	0	4.7128e-05
752	0	4.67985e-05
753	0	4.65535e-05
754	0	4.64102e-05
755	0	4.63862e-05
756	0	4.64983e-05
757	0	4.67615e-05
758	0	4.7188e-05
759	0	4.77864e-05
760	0	4.85607e-05
761	0	4.95099e-05
762	0	5.06273e-05
763	0	5.19008e-05
764	6.99979e-07	5.32152e-05
765	1.66893e-06	5.46077e-05
766	2.75104e-06	5.60722e-05
767	3.93801e-06	5.75786e-05
768	5.21625e-06	5.90948e-05
769	6.56677e-06	6.05881e-05
770	7.96531e-06	6.20263e-05
771	9.38276e-06	6.33789e-05
772	1.0786e-05	6.4619e-05
773	1.21389e-05	6.57236e-05
774	1.34036e-05	6.66753e-05
775	1.45422e-05	6.74626e-05
776	1.55179e-05	6.80805e-05
777	1.62972e-05	6.85305e-05
778	1.68506e-05	6.88209e-05
779	1.71549e-05	6.89654e-05
780	1.71934e-05	6.89831e-05
781	1.69573e-05	6.8897e-05
782	1.64459e-05	6.87328e-05
783	1.56667e-05	6.85174e-05
784	1.46352e-05	6.82776e-05
785	1.33742e-05	6.80384e-05
786	1.19126e-05	6.78219e-05
787	1.02847e-05	6.76463e-05
788	8.52855e-06	6.75251e-05
789	6.68437e-06	6.74666e-05
790	4.79318e-06	6.74742e-05
791	2.89532e-06	6.75462e-05
792	1.02904e-06	6.76771e-05
793	0	6.7751e-05
794	0	6.7735e-05
795	0	6.77642e-05
796	0	6.78309e-05
797	0	6.79282e-05
798	0	6.80513e-05
799	0	6.81981e-05
800	0	6.83698e-05
801	0	6.85713e-05
802	0	6.88105e-05
803	0	6.90984e-05
804	0	6.94482e-05
805	0	6.98744e-05
806	0	7.0392e-05
807	0	7.10154e-05
808	0	7.17575e-05
809	0	7.26283e-05
810	0	7.36351e-05
811	0	7.47811e-05
812	0	7.60651e-05
813	0	7.74817e-05
814	0	7.9021e-05
815	0	8.06688e-05
816	0	8.24069e-05
817	0	8.42135e-05
818	0	8.60642e-05
819	0	8.7932e-05
820	0	8.97886e-05
821	0	9.1605e-05
822	0	9.33527e-05
823	0	9.5004e-05
824	0	9.65338e-05
825	0	9.79198e-05
826	0	9.91439e-05
827	0	0.000100193
828	0	0.000101058
829	0	0.000101738
830	0	0.000102238
831	0	0.000102566
832	0	0.00010274
833	0	0.000102782
834	0	0.000102719
835	0	0.00010258
836	0	0.000102398
837	0	0.000102207
838	0	0.000102041
839	0	0.000101931
840	0	0.000101906
841	0	0.00010199
842	0	0.000102202
843	0	0.000102554
844	0	0.000103053
845	0	0.000103697
846	0	0.00010448
847	0	0.000105388
848	0	0.000106402
849	0	0.000107497
850	0	0.000108647
851	0	0.000109821
852	0	0.000110987
853	0	0.000112114
854	0	0.000113172
855	0	0.000114131
856	0	0.000114966
857	0	0.000115658
858	0	0.000116192
859	0	0.000116557
860	0	0.000116752
861	0	0.000116782
862	0	0.000116659
863	0	0.000116403
864	0	0.00011604
865	0	0.000115605
866	0	0.000115134
867	0	0.000114672
868	0	0.000114262
869	0	0.000113951
870	0	0.000113782
871	0	0.000113797
872	0	0.000114031
873	0	0.000114512
874	0	0.000115259
875	0	0.000116284
876	0	0.000117585
877	0	0.00011915
878	0	0.00012096
879	0	0.000122983
880	0	0.00012518
881	0	0.000127509
882	0	0.00012992
883	0	0.000132364
884	0	0.000134793
885	0	0.00013716
886	0	0.000139425
887	0	0.000141553
888	5.17225e-07	0.000143448
889	1.1813e-06	0.000145143
890	1.80684e-06	0.000146657
891	2.3674e-06	0.000147997
892	2.83833e-06	0.000149177
893	3.19778e-06	0.00015022
894	3.42775e-06	0.000151158
895	3.51476e-06	0.000152026
896	3.45039e-06	0.000152864
897	3.23142e-06	0.000153716
898	2.85984e-06	0.000154626
899	2.3424e-06	0.000155637
900	1.69014e-06	0.000156793
901	9.1754e-07	0.000158133
902	4.16853e-08	0.000159693
903	0	0.000161375
904	0	0.000163317
905	0	0.000165547
906	0	0.000168079
907	0	0.000170921
908	0	0.000174074
909	0	0.000177531
910	0	0.000181281
911	0	0.000185306
912	0	0.000189582
913	0	0.000194086
914	0	0.000198788
915	0	0.00020366
916	0	0.000208673
917	0	0.000213801
918	0	0.00021902
919	0	0.00022431
920	0	0.000229655
921	0	0.000235043
922	0	0.000240468
923	0	0.000245926
924	0	0.000251418
925	0	0.000256948
926	0	0.000262521
927	0	0.000268141
928	0	0.000273813
929	0	0.00027954
930	0	0.000285324
931	0	0.00029116
932	0	0.000297046
933	0	0.000302973
934	0	0.000308931
935	0	0.00031491
936	0	0.000320898
937	0	0.000326886
938	0	0.000332866
939	0	0.000338834
940	0	0.000344792
941	0	0.000350748
942	0	0.000356716
943	0	0.000362718
944	0	0.000368785
945	0	0.000374956
946	0	0.000381275
947	0	0.000387795
948	0	0.000394576
949	0	0.00040168
950	0	0.000409173
951	0	0.000417124
952	0	0.0004256
953	0	0.000434666
954	0	0.000444383
955	0	0.000454806
956	0	0.000465982
957	0	0.000477949
958	0	0.000490735
959	0	0.000504356
960	0	0.000518816
961	0	0.000534104
962	0	0.000550202
963	0	0.000567074
964	0	0.000584676
965	0	0.000602953
966	0	0.00062184
967	0	0.000641266
968	0	0.000661154
969	0	0.000681423
970	0	0.00070199
971	0	0.000722774
972	0	0.000743698
973	0	0.00076469
974	0	0.000785685
975	0	0.000806632
976	0	0.000827489
977	0	0.00084823
978	0	0.000868844
979	0	0.000889336
980	0	0.000909728
981	0	0.000930054
982	0	0.000950365
983	0	0.00097072
984	0	0.000991186
985	0	0.00101183
986	0	0.00103274
987	0	0.00105396
988	0	0.00107555
989	0	0.00109756
990	0	0.00112001
991	0	0.00114292
992	0	0.00116626
993	0	0.00119002
994	0	0.00121413
995	0	0.00123854
996	0	0.00126318
997	0	0.00128796
998	0	0.00131281
999	0	0.00133766
1000	0	0.00136244
1001	0	0.00138713
1002	0	0.00141168
1003	0	0.0014361
1004	0	0.00146041
1005	0	0.00148466
1006	0	0.0015089
1007	0	0.00153321
1008	0	0.00155768
1009	0	0.00158237
1010	0	0.00160738
1011	0	0.00163277
1012	0	0.00165858
1013	0	0.00168484
1014	0	0.00171154
1015	0	0.00173864
1016	0	0.00176608
1017	0	0.00179374
1018	0	0.0018215
1019	0	0.00184919
1020	0	0.00187664
1021	0	0.00190363
1022	0	0.00192998
1023	0	0.00195546
1024	0	0.00197987
1025	0	0.00200303
1026	0	0.00202477
1027	0	0.00204495
1028	0	0.00206345
1029	0	0.00208019
1030	0	0.00209515
1031	0	0.00210833
1032	0	0.00211974
1033	0	0.00212949
1034	0	0.00213765
1035	0	0.00214437
1036	0	0.0021498
1037	0	0.0021541
1038	0	0.00215742
1039	0	0.00215995
1040	0	0.00216184
1041	0	0.00216324
1042	0	0.00216426
1043	0	0.002165
1044	0	0.00216555
1045	0	0.00216595
1046	0	0.00216622
1047	0	0.00216636
1048	0	0.00216635
1049	0	0.00216615
1050	0	0.0021657
1051	0	0.00216494
1052	0	0.00216381
1053	0	0.00216222
1054	0	0.00216012
1055	0	0.00215743
1056	0	0.0021541
1057	0	0.00215006
1058	0	0.00214526
1059	0	0.00213965
1060	0	0.0021332
1061	0	0.00212585
1062	0	0.00211757
1063	0	0.00210832
1064	6.20215e-06	0.00209722
1065	1.74746e-05	0.0020844
1066	2.84321e-05	0.00207059
1067	3.89769e-05	0.00205579
1068	4.90149e-05	0.00204004
1069	5.84577e-05	0.00202337
1070	6.72234e-05	0.00200583
1071	7.52389e-05	0.00198749
1072	8.24408e-05	0.00196844
1073	8.8777e-05	0.0019488
1074	9.42085e-05	0.00192869
1075	9.87107e-05	0.00190826
1076	0.000102275	0.00188766
1077	0.000104908	0.00186707
1078	0.000106637	0.00184665
1079	0.000107504	0.00182657
1080	0.00010757	0.001807
1081	0.000106915	0.00178808
1082	0.00010563	0.00176996
1083	0.000103822	0.00175275
1084	0.000101607	0.00173653
1085	9.91052e-05	0.00172136
1086	9.64411e-05	0.00170727
1087	9.37355e-05	0.00169425
1088	9.11026e-05	0.00168227
1089	8.86459e-05	0.00167125
1090	8.64544e-05	0.00166112
1091	8.45998e-05	0.00165173
1092	8.31344e-05	0.00164297
1093	8.209e-05	0.00163467
1094	8.14779e-05	0.00162667
1095	8.12892e-05	0.00161883
1096	8.14967e-05	0.00161098
1097	8.2057e-05	0.00160297
1098	8.29131e-05	0.00159468
1099	8.39973e-05	0.00158601
1100	8.52338e-05	0.00157687
1101	8.65423e-05	0.00156722
1102	8.78398e-05	0.00155704
1103	8.90435e-05	0.00154635
1104	9.00723e-05	0.0015352
1105	9.08491e-05	0.00152367
1106	9.13018e-05	0.00151186
1107	9.13647e-05	0.00149991
1108	9.09796e-05	0.00148797
1109	9.00972e-05	0.0014762
1110	8.86781e-05	0.00146475
1111	8.66938e-05	0.0014538
1112	8.41277e-05	0.0014435
1113	8.09764e-05	0.00143399
1114	7.72498e-05	0.00142539
1115	7.29719e-05	0.00141779
1116	6.81802e-05	0.00141127
1117	6.29251e-05	0.00140586
1118	5.72685e-05	0.00140156
1119	5.12816e-05	0.00139837
1120	4.50424e-05	0.00139622
1121	3.86325e-05	0.00139505
1122	3.21339e-05	0.00139476
1123	2.5625e-05	0.00139526
1124	1.91778e-05	0.00139643
1125	1.28543e-05	0.00139815
1126	6.70405e-06	0.0014003
1127	7.62591e-07	0.00140278
1128	0	0.00140478
1129	0	0.00140684
1130	0	0.00140897
1131	0	0.00141112
1132	0	0.00141323
1133	0	0.00141526
1134	0	0.00141718
1135	0	0.00141898
1136	0	0.00142066
1137	0	0.00142223
1138	0	0.00142371
1139	0	0.00142511
1140	0	0.00142647
1141	0	0.00142782
1142	0	0.0014292
1143	0	0.00143065
1144	0	0.0014322
1145	0	0.00143389
1146	0	0.00143574
1147	0	0.00143779
1148	0	0.00144004
1149	0	0.0014425
1150	0	0.00144517
1151	0	0.00144803
1152	0	0.00145106
1153	0	0.00145422
1154	0	0.00145747
1155	0	0.00146074
1156	0	0.001464
1157	0	0.00146715
1158	0	0.00147014
1159	0	0.0014729
1160	0	0.00147534
1161	0	0.00147741
1162	0	0.00147902
1163	0	0.00148013
1164	0	0.00148066
1165	0	0.00148058
1166	0	0.00147982
1167	0	0.00147836
1168	0	0.00147616
1169	0	0.00147319
1170	0	0.00146945
1171	0	0.0014649
1172	0	0.00145955
1173	0	0.0014534
1174	0	0.00144643
1175	0	0.00143867
1176	0	0.00143011
1177	0	0.00142077
1178	0	0.00141065
1179	0	0.00139976
1180	0	0.00138813
1181	0	0.00137577
1182	0	0.00136269
1183	0	0.00134893
1184	0	0.00133451
1185	0	0.00131948
1186	0	0.00130386
1187	0	0.00128773
1188	0	0.00127114
1189	0	0.00125416
1190	0	0.00123688
1191	0	0.0012194
1192	0	0.00120183
1193	0	0.00118428
1194	0	0.00116687
1195	0	0.00114973
1196	0	0.00113299
1197	0	0.00111677
1198	0	0.00110119
1199	0	0.00108635
1200	0	0.00107237
1201	0	0.0010593
1202	0	0.00104722
1203	0	0.00103615
1204	0	0.00102613
1205	0	0.00101714
1206	0	0.00100917
1207	0	0.00100216
1208	0	0.000996056
1209	0	0.000990788
1210	0	0.000986271
1211	0	0.000982412
1212	0	0.000979118
1213	0	0.000976292
1214	0	0.00097384
1215	0	0.000971671
1216	0	0.000969699
1217	0	0.000967845
1218	0	0.000966033
1219	0	0.000964194
1220	0	0.000962266
1221	0	0.000960189
1222	0	0.00095791
1223	0	0.000955379
1224	0	0.000952547
1225	0	0.000949372
1226	0	0.000945815
1227	0	0.000941839
1228	0	0.000937413
1229	0	0.000932512
1230	0	0.000927116
1231	0	0.000921211
1232	0	0.000914791
1233	0	0.000907855
1234	0	0.000900411
1235	0	0.000892473
1236	0	0.00088406
1237	0	0.000875197
1238	0	0.000865913
1239	0	0.000856239
1240	0	0.000846211
1241	0	0.000835864
1242	6.71733e-08	0.000825227
1243	3.37097e-06	0.000813896
1244	6.41154e-06	0.000802397
1245	9.15842e-06	0.000790772
1246	1.15782e-05	0.000779066
1247	1.36362e-05	0.000767325
1248	1.5298e-05	0.000755596
1249	1.65319e-05	0.000743929
1250	1.73109e-05	0.000732373
1251	1.76148e-05	0.00072098
1252	1.74323e-05	0.000709802
1253	1.67622e-05	0.000698891
1254	1.56146e-05	0.000688296
1255	1.40115e-05	0.000678065
1256	1.19864e-05	0.00066824
1257	9.58347e-06	0.000658859
1258	6.85677e-06	0.000649952
1259	3.86815e-06	0.00064154
1260	6.85362e-07	0.000633633
1261	0	0.000625869
1262	0	0.0006185
1263	0	0.000611607
1264	0	0.00060517
1265	0	0.000599155
1266	0	0.00059352
1267	0	0.000588216
1268	0	0.00058319
1269	0	0.000578385
1270	0	0.000573748
1271	0	0.000569226
1272	0	0.000564777
1273	0	0.000560364
1274	0	0.000555964
1275	0	0.000551567
1276	0	0.000547176
1277	0	0.000542808
1278	0	0.000538495
1279	0	0.00053428
1280	0	0.000530213
1281	0	0.000526356
1282	0	0.00052277
1283	0	0.00051952
1284	0	0.000516667
1285	0	0.000514265
1286	0	0.000512362
1287	0	0.000510995
1288	0	0.00051019
1289	0	0.000509963
1290	3.42106e-06	0.000509842
1291	7.32791e-06	0.00051023
1292	1.1445e-05	0.000511154
1293	1.57662e-05	0.000512594
1294	2.02804e-05	0.000514531
1295	2.49707e-05	0.000516944
1296	2.98139e-05	0.000519812
1297	3.47797e-05	0.00052312
1298	3.98315e-05	0.000526853
1299	4.49255e-05	0.000531001
1300	5.00119e-05	0.00053556
1301	5.5035e-05	0.000540523
1302	5.99345e-05	0.000545887
1303	6.46461e-05	0.000551649
1304	6.91035e-05	0.000557798
1305	7.32392e-05	0.00056432
1306	7.69868e-05	0.000571195
1307	8.02824e-05	0.00057839
1308	8.30663e-05	0.000585866
1309	8.52853e-05	0.00059357
1310	8.68938e-05	0.000601442
1311	8.7856e-05	0.000609409
1312	8.81472e-05	0.000617392
1313	8.77547e-05	0.000625307
1314	8.66789e-05	0.000633065
1315	8.49339e-05	0.000640578
1316	8.25476e-05	0.00064776
1317	7.95617e-05	0.000654531
1318	7.60306e-05	0.000660819
1319	7.20211e-05	0.000666564
1320	6.76106e-05	0.000671718
1321	6.28855e-05	0.000676251
1322	5.79397e-05	0.000680146
1323	5.28721e-05	0.000683401
1324	4.77845e-05	0.000686034
1325	4.27793e-05	0.000688075
1326	3.79573e-05	0.000689566
1327	3.3415e-05	0.000690562
1328	2.92431e-05	0.000691124
1329	2.55238e-05	0.00069132
1330	2.23295e-05	0.000691217
1331	1.97208e-05	0.000690883
1332	1.77455e-05	0.000690383
1333	1.6437e-05	0.000689772
1334	1.58141e-05	0.0006891
1335	1.58802e-05	0.000688404
1336	1.66231e-05	0.000687712
1337	1.80151e-05	0.000687041
1338	2.0014e-05	0.000686396
1339	2.25634e-05	0.000685775
1340	2.55945e-05	0.000685166
1341	2.90275e-05	0.000684554
1342	3.27739e-05	0.000683919
1343	3.67383e-05	0.000683242
1344	4.0822e-05	0.000682504
1345	4.4925e-05	0.000681694
1346	4.89493e-05	0.000680801
1347	5.28018e-05	0.000679827
1348	5.63973e-05	0.000678777
1349	5.96606e-05	0.000677666
1350	6.25292e-05	0.000676515
1351	6.49546e-05	0.000675352
1352	6.69037e-05	0.000674206
1353	6.83591e-05	0.00067311
1354	6.93192e-05	0.000672093
1355	6.97971e-05	0.000671181
1356	6.98198e-05	0.000670395
1357	6.94258e-05	0.000669746
1358	6.86634e-05	0.000669233
1359	6.75878e-05	0.000668846
1360	6.62593e-05	0.000668562
1361	6.47397e-05	0.000668345
1362	6.30911e-05	0.000668149
1363	6.13726e-05	0.00066792
1364	5.96396e-05	0.000667596
1365	5.79415e-05	0.000667112
1366	5.63211e-05	0.000666403
1367	5.48138e-05	0.000665404
1368	5.34474e-05	0.000664059
1369	5.22423e-05	0.000662319
1370	5.12115e-05	0.000660149
1371	5.03615e-05	0.000657524
1372	4.96928e-05	0.000654436
1373	4.92008e-05	0.000650893
1374	4.88765e-05	0.000646918
1375	4.87078e-05	0.000642547
1376	4.86797e-05	0.000637832
1377	4.87756e-05	0.000632837
1378	4.8978e-05	0.000627634
1379	4.9269e-05	0.000622302
1380	4.96314e-05	0.000616924
1381	5.0049e-05	0.000611585
1382	5.05075e-05	0.000606369
1383	5.09952e-05	0.000601356
1384	5.15035e-05	0.000596619
1385	5.20275e-05	0.000592225
1386	5.25666e-05	0.000588231
1387	5.31246e-05	0.000584683
1388	5.37106e-05	0.000581618
1389	5.43383e-05	0.000579059
1390	5.50266e-05	0.000577019
1391	5.57986e-05	0.000575501
1392	5.66815e-05	0.000574494
1393	5.77054e-05	0.00057398
1394	5.89027e-05	0.000573933
1395	6.03063e-05	0.000574316
1396	6.1949e-05	0.000575089
1397	6.38618e-05	0.000576207
1398	6.60729e-05	0.000577621
1399	6.86065e-05	0.000579283
1400	7.14827e-05	0.000581146
1401	7.47163e-05	0.000583166
1402	7.83175e-05	0.000585305
1403	8.2292e-05	0.000587533
1404	8.66419e-05	0.000589829
1405	9.13667e-05	0.000592183
1406	9.64649e-05	0.000594598
1407	0.000101936	0.00059709
1408	0.000107779	0.000599687
1409	0.000114	0.000602431
1410	0.000120607	0.000605374
1411	0.000127614	0.000608579
1412	0.00013504	0.000612113
1413	0.000142909	0.000616051
1414	0.000151248	0.000620465
1415	0.000160088	0.000625427
1416	0.000169459	0.000631002
1417	0.000179386	0.000637245
1418	0.000189891	0.000644198
1419	0.000200983	0.000651888
1420	0.00021266	0.000660322
1421	0.000224903	0.000669491
1422	0.000237674	0.000679362
1423	0.000250914	0.000689882
1424	0.000264541	0.000700979
1425	0.000278452	0.000712559
1426	0.000292519	0.000724511
1427	0.000306599	0.000736707
1428	0.00032053	0.000749007
1429	0.000334138	0.000761262
1430	0.000347241	0.000773314
1431	0.000359656	0.000785004
1432	0.000371205	0.000796175
1433	0.000381716	0.000806677
1434	0.000391033	0.000816368
1435	0.000399022	0.000825123
1436	0.000405569	0.000832832
1437	0.000410587	0.00083941
1438	0.000414017	0.000844794
1439	0.000415828	0.000848945
1440	0.000416018	0.000851853
1441	0.000414609	0.000853533
1442	0.00041165	0.000854024
1443	0.000407208	0.000853389
1444	0.000401372	0.000851709
1445	0.000394242	0.000849083
1446	0.00038593	0.000845621
1447	0.000376558	0.000841442
1448	0.000366251	0.000836666
1449	0.000355138	0.000831418
1450	0.000343348	0.000825816
1451	0.000331008	0.000819974
1452	0.000318243	0.000813998
1453	0.000305173	0.000807985
1454	0.000291914	0.00080202
1455	0.000278573	0.000796182
1456	0.000265252	0.000790537
1457	0.000252044	0.000785142
1458	0.000239034	0.000780047
1459	0.000226295	0.000775289
1460	0.000213893	0.000770901
1461	0.000201882	0.000766906
1462	0.000190308	0.000763317
1463	0.000179207	0.00076014
1464	0.000168603	0.000757374
1465	0.000158515	0.000755007
1466	0.000148953	0.000753021
1467	0.00013992	0.000751388
1468	0.000131414	0.000750077
1469	0.000123428	0.000749051
1470	0.000115953	0.000748267
1471	0.000108974	0.000747685
1472	0.000102477	0.000747263
1473	9.64426e-05	0.00074696
1474	9.08535e-05	0.00074674
1475	8.56889e-05	0.000746572
1476	8.09273e-05	0.000746427
1477	7.65466e-05	0.000746283
1478	7.25235e-05	0.000746119
1479	6.88348e-05	0.000745919
1480	6.54571e-05	0.000745666
1481	6.23675e-05	0.000745341
1482	5.95447e-05	0.000744921
1483	5.69689e-05	0.000744381
1484	5.46234e-05	0.000743688
1485	5.24945e-05	0.000742802
1486	5.05723e-05	0.000741678
1487	4.8851e-05	0.000740264
1488	4.73291e-05	0.000738504
1489	4.60087e-05	0.000736339
1490	4.48958e-05	0.000733711
1491	4.3999e-05	0.000730561
1492	4.33287e-05	0.000726838
1493	4.28961e-05	0.000722495
1494	4.27122e-05	0.000717494
1495	4.27861e-05	0.000711808
1496	4.31245e-05	0.00070542
1497	4.37301e-05	0.000698325
1498	4.46016e-05	0.000690529
1499	4.57322e-05	0.00068205
1500	4.711e-05	0.000672914
1501	4.8718e-05	0.00066316
1502	5.05337e-05	0.00065283
1503	5.253e-05	0.000641977
1504	5.46757e-05	0.000630654
1505	5.69358e-05	0.000618922
1506	5.92728e-05	0.00060684
1507	6.16469e-05	0.000594469
1508	6.40168e-05	0.00058187
1509	6.63408e-05	0.000569101
1510	6.85767e-05	0.000556219
1511	7.06828e-05	0.000543276
1512	7.26184e-05	0.000530323
1513	7.43443e-05	0.000517406
1514	7.58232e-05	0.00050457
1515	7.70203e-05	0.000491855
1516	7.79042e-05	0.0004793
1517	7.84474e-05	0.000466944
1518	7.8627e-05	0.000454822
1519	7.84255e-05	0.000442972
1520	7.78316e-05	0.000431429
1521	7.68405e-05	0.00042023
1522	7.54548e-05	0.000409412
1523	7.36845e-05	0.000399012
1524	7.15471e-05	0.000389065
1525	6.90671e-05	0.000379603
1526	6.62757e-05	0.000370657
1527	6.32101e-05	0.000362251
1528	5.99118e-05	0.000354402
1529	5.6426e-05	0.000347121
1530	5.27996e-05	0.000340409
1531	4.90803e-05	0.000334257
1532	4.53146e-05	0.000328646
1533	4.1547e-05	0.000323545
1534	3.78186e-05	0.000318914
1535	3.41664e-05	0.000314707
1536	3.06226e-05	0.000310865
1537	2.72145e-05	0.00030733
1538	2.39645e-05	0.000304036
1539	2.089e-05	0.000300919
1540	1.80044e-05	0.000297914
1541	1.53171e-05	0.000294963
1542	1.28345e-05	0.00029201
1543	1.05604e-05	0.00028901
1544	8.49699e-06	0.000285924
1545	6.64466e-06	0.000282722
1546	5.00297e-06	0.000279385
1547	3.57061e-06	0.000275902
1548	2.34553e-06	0.000272271
1549	1.32499e-06	0.000268496
1550	5.05443e-07	0.000264591
1551	0	0.000260555
1552	0	0.000256383
1553	0	0.000252168
1554	0	0.000247935
1555	0	0.000243711
1556	0	0.00023952
1557	0	0.000235389
1558	4.06975e-07	0.000231286
1559	1.05874e-06	0.000227259
1560	1.81853e-06	0.000223351
1561	2.67365e-06	0.000219588
1562	3.61169e-06	0.000215996
1563	4.62076e-06	0.0002126
1564	5.6896e-06	0.000209427
1565	6.80771e-06	0.000206502
1566	7.96532e-06	0.000203852
1567	9.15339e-06	0.000201502
1568	1.03636e-05	0.000199477
1569	1.15881e-05	0.000197802
1570	1.28196e-05	0.000196498
1571	1.40513e-05	0.000195584
1572	1.52767e-05	0.000195077
1573	1.64896e-05	0.000194988
1574	1.76841e-05	0.000195325
1575	1.88549e-05	0.000196087
1576	1.99969e-05	0.000197271
1577	2.11057e-05	0.000198863
1578	2.21776e-05	0.000200846
1579	2.32095e-05	0.000203194
1580	2.41994e-05	0.000205876
1581	2.51464e-05	0.000208856
1582	2.60505e-05	0.000212091
1583	2.69132e-05	0.000215539
1584	2.77371e-05	0.000219154
1585	2.85259e-05	0.000222892
1586	2.92849e-05	0.000226711
1587	3.00201e-05	0.000230574
1588	3.07387e-05	0.00023445
1589	3.14485e-05	0.000238315
1590	3.2158e-05	0.000242153
1591	3.28757e-05	0.00024596
1592	3.36103e-05	0.000249741
1593	3.437e-05	0.000253508
1594	3.51624e-05	0.000257286
1595	3.59943e-05	0.000261105
1596	3.68715e-05	0.000265003
1597	3.77984e-05	0.000269022
1598	3.87783e-05	0.000273207
1599	3.98133e-05	0.000277604
1600	4.09044e-05	0.000282258
1601	4.20518e-05	0.000287212
1602	4.32549e-05	0.000292502
1603	4.45131e-05	0.00029816
1604	4.58259e-05	0.000304211
1605	4.71935e-05	0.000310671
1606	4.86172e-05	0.000317548
1607	5.00995e-05	0.000324844
1608	5.16451e-05	0.000332548
1609	5.32604e-05	0.000340645
1610	5.49544e-05	0.000349109
1611	5.67382e-05	0.00035791
1612	5.86253e-05	0.000367012
1613	6.06315e-05	0.000376371
1614	6.27742e-05	0.000385941
1615	6.50725e-05	0.000395675
1616	6.75464e-05	0.000405523
1617	7.02164e-05	0.000415434
1618	7.31028e-05	0.00042536
1619	7.6225e-05	0.000435255
1620	7.96011e-05	0.000445077
1621	8.32466e-05	0.000454789
1622	8.71745e-05	0.000464361
1623	9.13938e-05	0.000473769
1624	9.59098e-05	0.000482995
1625	0.000100723	0.000492029
1626	0.000105828	0.000500871
1627	0.000111217	0.000509522
1628	0.000116872	0.000517992
1629	0.000122774	0.000526294
1630	0.000128895	0.000534442
1631	0.000135204	0.000542453
1632	0.000141666	0.00055034
1633	0.000148239	0.000558112
1634	0.000154881	0.000565774
1635	0.000161546	0.000573323
1636	0.000168187	0.000580747
1637	0.000174758	0.000588027
1638	0.000181214	0.000595131
1639	0.000187512	0.000602021
1640	0.000193615	0.000608647
1641	0.000199487	0.000614955
1642	0.000205103	0.000620882
1643	0.000210441	0.000626367
1644	0.000215488	0.000631342
1645	0.000220238	0.000635747
1646	0.000224694	0.000639521
1647	0.000228864	0.000642613
1648	0.000232763	0.00064498
1649	0.000236411	0.000646588
1650	0.000239834	0.000647417
1651	0.000243059	0.000647456
1652	0.000246115	0.000646709
1653	0.000249031	0.000645191
1654	0.000251836	0.000642927
1655	0.000254555	0.000639955
1656	0.000257211	0.000636319
1657	0.000259823	0.000632074
1658	0.000262406	0.00062728
1659	0.000264971	0.000622001
1660	0.000267526	0.000616306
1661	0.000270077	0.000610267
1662	0.000272628	0.000603956
1663	0.000275181	0.000597448
1664	0.000277742	0.000590814
1665	0.000280316	0.000584126
1666	0.000282912	0.000577453
1667	0.000285544	0.000570859
1668	0.000288229	0.000564406
1669	0.000290991	0.000558148
1670	0.000293856	0.000552136
1671	0.000296859	0.000546414
1672	0.000300033	0.000541016
1673	0.00030342	0.000535973
1674	0.00030706	0.000531308
1675	0.000310993	0.000527034
1676	0.00031526	0.000523161
1677	0.000319898	0.000519692
1678	0.000324938	0.000516624
1679	0.000330409	0.000513951
1680	0.00033633	0.00051166
1681	0.000342716	0.00050974
1682	0.000349574	0.000508172
1683	0.000356901	0.00050694
1684	0.000364692	0.000506025
1685	0.000372933	0.000505408
1686	0.000381605	0.000505068
1687	0.000390686	0.000504986
1688	0.000400152	0.000505143
1689	0.000409976	0.00050552
1690	0.000420133	0.000506098
1691	0.000430596	0.00050686
1692	0.000441341	0.000507788
1693	0.000452342	0.000508865
1694	0.000463576	0.000510076
1695	0.000475017	0.000511402
1696	0.000486639	0.000512829
1697	0.000498412	0.000514339
1698	0.0005103	0.000515914
1699	0.000522262	0.000517537
1700	0.000534249	0.000519187
1701	0.000546201	0.000520843
1702	0.000558049	0.000522481
1703	0.000569713	0.000524075
1704	0.000581105	0.000525595
1705	0.000592126	0.000527007
1706	0.000602671	0.000528274
1707	0.000612629	0.000529357
1708	0.000621889	0.00053021
1709	0.000630341	0.000530788
1710	0.000637878	0.000531042
1711	0.000644405	0.000530921
1712	0.000649836	0.000530379
1713	0.000654103	0.000529368
1714	0.000657156	0.000527848
1715	0.000658966	0.000525787
1716	0.000659528	0.000523161
1717	0.00065886	0.000519957
1718	0.000657006	0.000516179
1719	0.000654036	0.000511841
1720	0.000650043	0.000506978
1721	0.000645144	0.000501636
1722	0.000639474	0.00049588
1723	0.000633189	0.000489787
1724	0.000626456	0.000483445
1725	0.000619456	0.000476952
1726	0.000612372	0.00047041
1727	0.000605395	0.000463925
1728	0.000598709	0.000457601
1729	0.000592496	0.000451536
1730	0.000586926	0.000445821
1731	0.000582156	0.000440537
1732	0.000578327	0.000435748
1733	0.000575562	0.000431507
1734	0.000573962	0.000427848
1735	0.000573607	0.00042479
1736	0.000574553	0.000422338
1737	0.000576833	0.000420477
1738	0.000580457	0.000419182
1739	0.000585413	0.000418414
1740	0.000591668	0.000418124
1741	0.000599169	0.000418256
1742	0.000607845	0.000418746
1743	0.000617611	0.000419525
1744	0.000628367	0.000420524
1745	0.000640005	0.000421671
1746	0.00065241	0.000422893
1747	0.000665464	0.000424121
1748	0.000679049	0.000425285
1749	0.000693056	0.000426318
1750	0.000707379	0.000427154
1751	0.000721931	0.000427732
1752	0.00073664	0.000427989
1753	0.000751453	0.000427869
1754	0.000766341	0.000427314
1755	0.000781302	0.000426273
1756	0.000796358	0.000424698
1757	0.000811555	0.000422546
1758	0.000826966	0.000419781
1759	0.000842681	0.000416374
1760	0.000858808	0.000412309
1761	0.000875466	0.00040758
1762	0.000892774	0.000402194
1763	0.000910849	0.000396172
1764	0.000929795	0.000389551
1765	0.000949694	0.000382382
1766	0.000970599	0.000374731
1767	0.000992528	0.000366673
1768	0.00101546	0.000358296
1769	0.00103932	0.000349696
1770	0.00106399	0.00034097
1771	0.00108931	0.000332217
1772	0.00111507	0.000323534
1773	0.00114104	0.000315008
1774	0.00116693	0.00030672
1775	0.00119245	0.000298737
1776	0.00121732	0.000291113
1777	0.00124122	0.000283885
1778	0.0012639	0.000277076
1779	0.00128511	0.000270694
1780	0.00130465	0.000264731
1781	0.00132236	0.000259169
1782	0.00133816	0.000253975
1783	0.00135202	0.000249109
1784	0.00136399	0.000244524
1785	0.00137417	0.000240166
1786	0.00138274	0.000235979
1787	0.00138993	0.000231904
1788	0.00139602	0.000227884
1789	0.00140133	0.000223862
1790	0.00140623	0.000219782
1791	0.00141109	0.000215595
1792	0.00141631	0.000211252
1793	0.00142229	0.000206713
1794	0.00142941	0.000201941
1795	0.00143806	0.000196907
1796	0.00144858	0.000191587
1797	0.00146131	0.000185967
1798	0.00147654	0.000180036
1799	0.00149454	0.000173792
1800	0.00151555	0.000167237
1801	0.00153977	0.00016038
1802	0.0015674	0.000153232
1803	0.00159858	0.000145804
1804	0.00163346	0.000138111
1805	0.00167218	0.000130162
1806	0.00171487	0.000121964
1807	0.00176167	0.000113518
1808	0.00181271	0.000104819
1809	0.00186817	9.58503e-05
1810	0.00192821	8.65901e-05
1811	0.00199304	7.7006e-05
1812	0.00206286	6.70579e-05
1813	0.0021379	5.66995e-05
1814	0.0022184	4.588e-05
1815	0.00230458	3.45473e-05
1816	0.00239665	2.26506e-05
1817	0.00249479	1.01447e-05
1818	0.00259803	0
1819	0.00270356	0
1820	0.00281504	0
1821	0.00293234	0
1822	0.00305517	0
1823	0.00318312	0
1824	0.00331565	0
1825	0.00345202	0
1826	0.00359135	0
1827	0.00373262	0
1828	0.00387464	0
1829	0.0040161	0
1830	0.00415556	0
1831	0.00429154	0
1832	0.00442247	0
1833	0.00454679	0
1834	0.00466295	0
1835	0.00476948	0
1836	0.00486498	0
1837	0.00494821	0
1838	0.0050181	0
1839	0.00507375	0
1840	0.00511452	0
1841	0.00513997	0
1842	0.00514992	0
1843	0.00514443	0
1844	0.00512381	0
1845	0.00508859	0
1846	0.00503952	0
1847	0.00497753	0
1848	0.00490372	0
1849	0.00481929	0
1850	0.00472555	0
1851	0.00462386	0
1852	0.00451559	0
1853	0.0044021	0
1854	0.00428468	0
1855	0.00416457	0
1856	0.00404292	0
1857	0.00392073	0
1858	0.0037989	0
1859	0.00367823	0
1860	0.00355935	0
1861	0.00344279	0
1862	0.003329	0
1863	0.0032183	0
1864	0.00311094	0
1865	0.00300712	0
1866	0.00290699	0
1867	0.00281064	0
1868	0.00271816	0
1869	0.00262962	0
1870	0.00254508	0
1871	0.00246459	0
1872	0.0023882	0
1873	0.00231597	0
1874	0.00224795	0
1875	0.00218416	0
1876	0.00212466	0
1877	0.00206947	0
1878	0.00201861	0
1879	0.00197207	0
1880	0.00192985	0
1881	0.00189193	0
1882	0.00185828	0
1883	0.00182887	0
1884	0.00180365	0
1885	0.00178256	0
1886	0.00176557	0
1887	0.00175261	0
1888	0.00174365	0
1889	0.00173863	0
1890	0.00173751	0
1891	0.00174024	0
1892	0.00174676	0
1893	0.00175702	0
1894	0.00177093	0
1895	0.00178841	0
1896	0.00180934	0
1897	0.00183357	0
1898	0.00186094	0
1899	0.00189123	0
1900	0.00192417	0
1901	0.00195948	0
1902	0.00199681	0
1903	0.00203576	0
1904	0.00207589	0
1905	0.00211673	0
1906	0.00215775	0
1907	0.00219839	0
1908	0.00223807	0
1909	0.00227617	0
1910	0.00231207	0
1911	0.00234516	0
1912	0.00237482	0
1913	0.00240047	0
1914	0.00242158	0
1915	0.00243764	0
1916	0.00244822	0
1917	0.00245298	0
1918	0.00245163	0
1919	0.002444	0
1920	0.00243	0
1921	0.00240964	0
1922	0.00238304	0
1923	0.00235038	0
1924	0.00231195	0
1925	0.00226811	0
1926	0.0022193	0
1927	0.002166	0
1928	0.00210874	0
1929	0.00204808	0
1930	0.00198461	0
1931	0.00191892	0
1932	0.00185161	0
1933	0.00178326	0
1934	0.00171445	0
1935	0.00164572	0
1936	0.00157757	0
1937	0.00151049	0
1938	0.0014449	0
1939	0.00138119	0
1940	0.0013197	0
1941	0.00126073	0
1942	0.00120452	0
1943	0.00115126	0
1944	0.00110111	0
1945	0.00105415	0
1946	0.00101047	0
1947	0.000970072	0
1948	0.000932955	0
1949	0.000899073	0
1950	0.000868356	0
1951	0.00084071	0
1952	0.000816019	0
1953	0.000794148	0
1954	0.000774945	0
1955	0.000758242	0
1956	0.000743858	0
1957	0.0007316	0
1958	0.000721263	0
1959	0.000712234	1.09434e-06
1960	0.000704535	2.62146e-06
1961	0.000698161	3.9876e-06
1962	0.000692871	5.2455e-06
1963	0.000688427	6.44597e-06
1964	0.000684605	7.63597e-06
1965	0.000681195	8.85697e-06
1966	0.000678011	1.01436e-05
1967	0.000674888	1.15229e-05
1968	0.000671697	1.30134e-05
1969	0.000668337	1.46256e-05
1970	0.000664742	1.63619e-05
1971	0.000660881	1.82175e-05
1972	0.000656753	2.01814e-05
1973	0.000652387	2.22375e-05
1974	0.000647834	2.43663e-05
1975	0.000643166	2.65459e-05
1976	0.000638464	2.87538e-05
1977	0.000633817	3.09677e-05
1978	0.00062931	3.31667e-05
1979	0.000625023	3.53321e-05
1980	0.000621021	3.74476e-05
1981	0.000617354	3.94997e-05
1982	0.000614052	4.14774e-05
1983	0.000611122	4.3372e-05
1984	0.00060855	4.51767e-05
1985	0.000606301	4.68857e-05
1986	0.000604322	4.84941e-05
1987	0.000602541	4.99968e-05
1988	0.000600874	5.13888e-05
1989	0.000599228	5.26643e-05
1990	0.000597502	5.38171e-05
1991	0.000595592	5.48407e-05
1992	0.000593393	5.57285e-05
1993	0.000590806	5.64746e-05
1994	0.000587733	5.70739e-05
1995	0.000584087	5.75233e-05
[truncated: 1,505 more rows]
[truncated: 147 more columns]
